# Supplementary material for: Insight into natural medium remediation through ecotoxicity correlation with clay catalyst selectivity in organic molecule ozonation
Source: Royal Society of Chemistry journal article supplement (doi:10.1039/d1dt04238f), 2022-01-01
Supplement: d1dt04238f1.pdf [file d1dt04238f1.pdf]

## Insight in natural media remediation through ecotoxicity correlation to clay catalyst selectivity in organic molecule ozonation

Amina Benghaffour et al. ... Abdelkrim Azzouz\*

### SUPPORTING INFORMATION

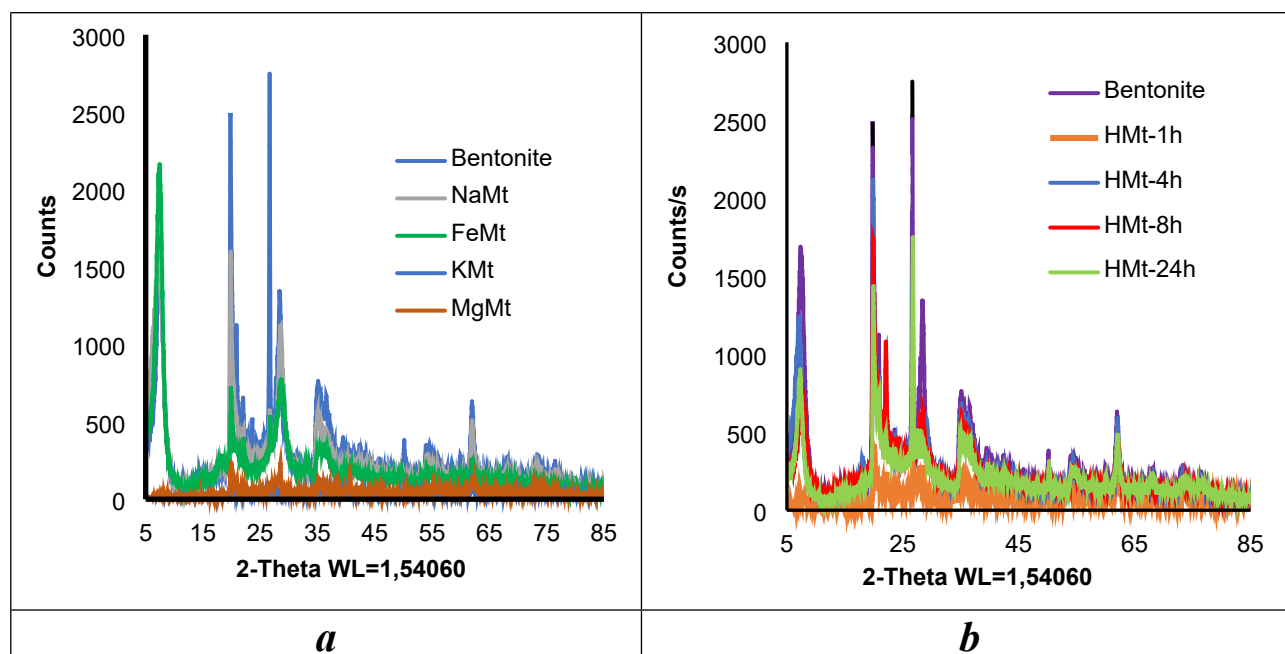

**Fig. S1.** XRD patterns of ion-exchanged montmorillonites (a) and acid-activated bentonites (b).

**Table S1.** Some features of the investigated organic molecules.

| Organic compound        | Structure de la molécule | Oxygen/Carbon atom ratio | pK <sub>a</sub> | λ <sub>max</sub> (nm) | Masse molaire (g/mol) |
|-------------------------|--------------------------|--------------------------|-----------------|-----------------------|-----------------------|
| Diazinon (DAZ)          |                          | 3/12                     | 2.6             | 250                   | 304.35                |
| Diclofenac sodium (DCF) |                          | 1/14                     | 4.35 ± 0.2      | 275                   | 318.1                 |

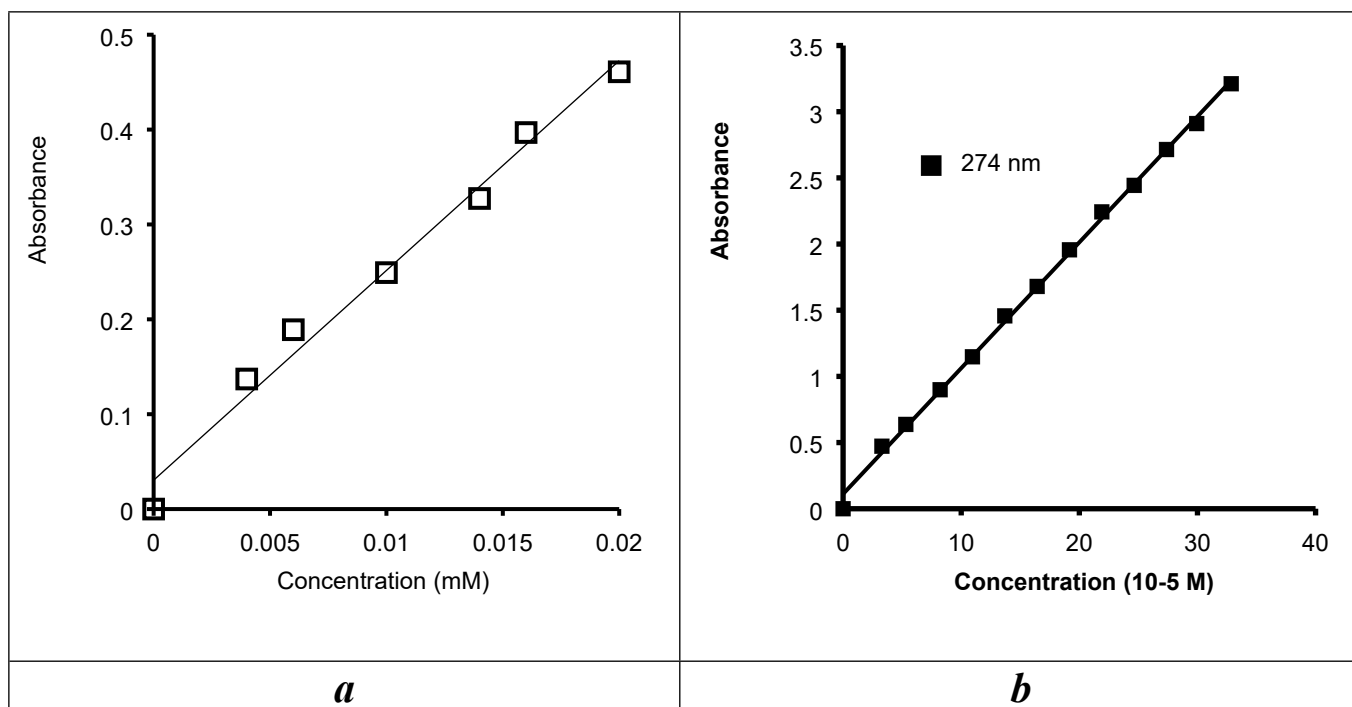

**Fig. S2.** Calibration curve of DAZ (a) and DCF (b) as assessed by UV-VIS. Quartz cell width: 1 cm.

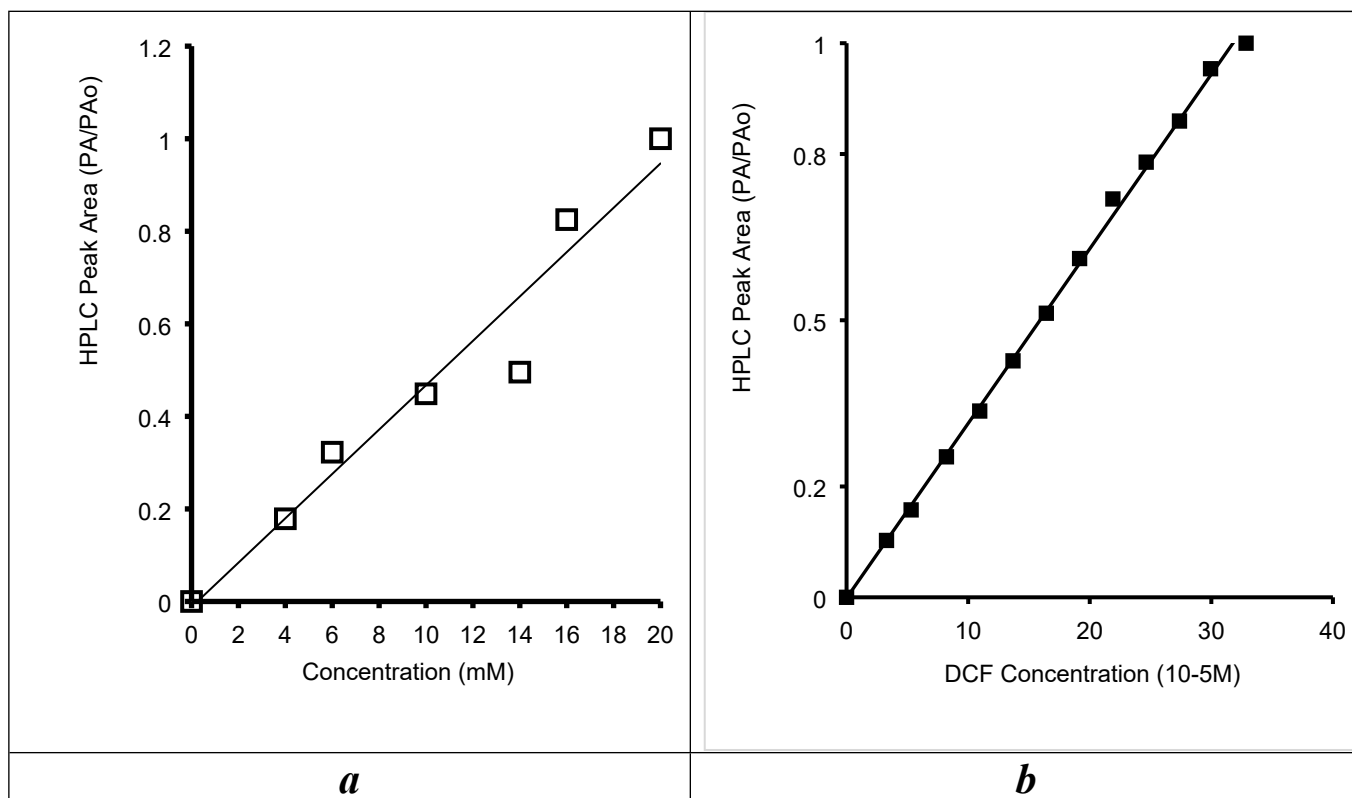

**Fig. S3.** Calibration curves of DAZ (a) and DCF (b) as assessed by HPLC-UV.

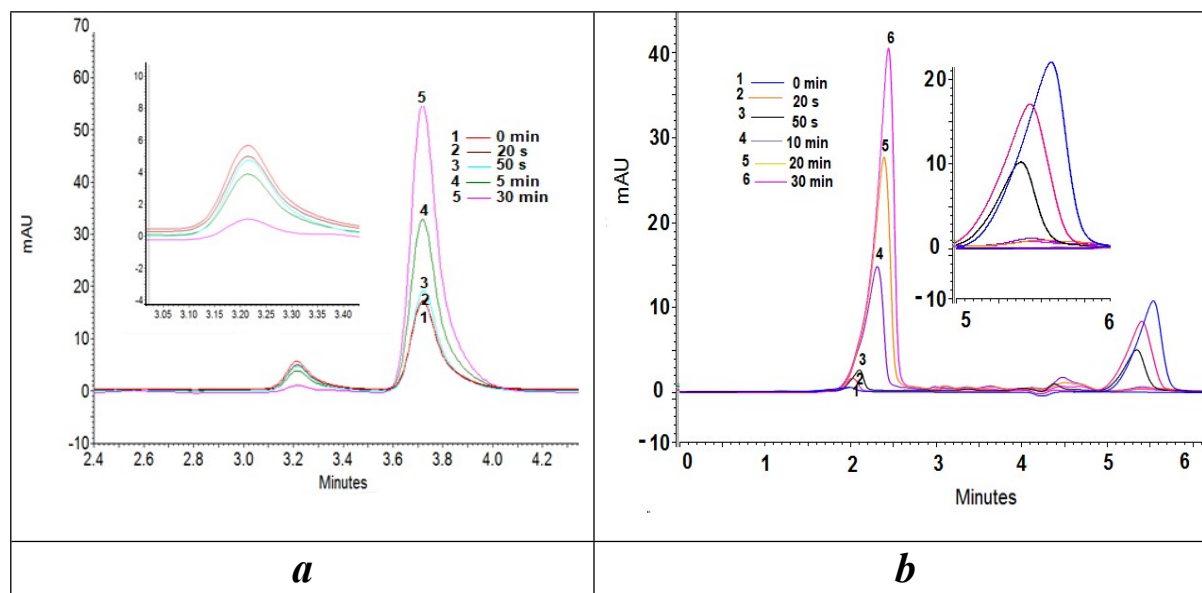

**Fig. S4.** Evolution during non-catalytic ozonation of the HPLC-UV peak area of Diazinon (a), Diclofenac (b). Ozone flow rate: 600 mg h<sup>-1</sup>. Sample volume = 20 mL. Substrate initial concentration: 10<sup>-5</sup> M.

**Table S2.** Initial physico-chemical feature of the reaction mixture before ozonation.

| Catalyst  | Water           |                                 |                                  | DCF             |                                 |                                  |
|-----------|-----------------|---------------------------------|----------------------------------|-----------------|---------------------------------|----------------------------------|
|           | pH <sup>a</sup> | Particle size (μm) <sup>b</sup> | Zeta potential (mV) <sup>c</sup> | pH <sup>d</sup> | Particle size (μm) <sup>e</sup> | Zeta potential (mV) <sup>f</sup> |
| Bentonite | 6.00            | 1.50                            | -21.98                           | 5.60            | 0.36                            | -39.58                           |
| HMt-1     | 4.88            | 1.74                            | -16.18                           | 4.83            | 2.07                            | -34.99                           |
| HMt-4     | 4.50            | 1.46                            | -19.38                           | 4.71            | 1.60                            | -32.68                           |
| HMt-8     | 4.27            | 1.74                            | -34.40                           | 4.63            | 0.88                            | -31.25                           |
| HMt-15    | 3.79            | 1.62                            | -35.93                           | 4.72            | 1.37                            | -27.44                           |
| HMt-24    | 4.25            | 2.37                            | -22.29                           | 4.73            | 2.00                            | -29.80                           |
| NaMt      | 6.27            | 0.76                            | -22.39                           | 4.61            | 1.07                            | -30.26                           |
| KMt       | 5.22            | 0.56                            | -18.91                           | 5.30            | 2.10                            | -33.39                           |
| CaMt      | 4.75            | 0.67                            | -23.14                           | 5.01            | 0.55                            | -15.49                           |
| MgMt      | 5.80            | 1.02                            | -15.85                           | 5.05            | 0.66                            | -19.73                           |
| CoMt      | 5.22            | 1.24                            | -15.66                           | 5.44            | 1.32                            | -18.45                           |
| CuMt      | 4.32            | 1.99                            | -05.18                           | 4.59            | 1.86                            | -23.63                           |
| NiMt      | 4.54            | 1.66                            | -27.22                           | 5.51            | 1.22                            | -23.00                           |
| Fe(II)Mt  | 3.76            | 2.59                            | -22.20                           | 4.53            | 2.17                            | -26.81                           |
| LDH       | 3.94            | 6.76                            | +5.54                            | 6.74            | 3.85                            | +8.90                            |

a These pH measurements were carried out in 20 mL of distilled water with 40 mg of clay catalyst at T = 22 ° C.

b These particle size values were measured in the absence of organic molecules.

c These Zeta potential values were measured in the absence of organic molecules.

d pH of the aqueous solution in the presence of the organic molecule at T = 22 ° C after addition of catalyst.

e These particle size values were measured in the presence of organic molecules.

f These Zeta potential values were measured in the presence of organic molecules.

### Ozone determination by titration of the KI solution

Ozone was titrated by iodometry. For this purpose, ten samples of 200 mL potassium iodide solution (KI) were prepared by dissolving 0.5 g KI and 0.05g of potassium iodate (KIO<sub>3</sub>) in 200 mL distilled water. Each sample was acidified with 10 mL of 1M HCl and then mixed with 7.8 mL of 0.1 M sodium thiosulfate (Na<sub>2</sub>S<sub>2</sub>O<sub>3</sub>) (dark yellow solution). All samples were ozonized for five minutes at different ozone concentrations (10-100%) and then analyzed by UV-Vis spectrophotometry. A 1 mL amount of starch indicator was added to the solution (blue) and titration was achieved with 0.1M Na<sub>2</sub>S<sub>2</sub>O<sub>3</sub> until the appearance of the pale yellow color. The mole number  $n(O_3)$  and mass flow,  $D_{mass}$ , were calculated from the consumed volume of sodium thiosulphate,  $V(S_2O_3^{2-})$

$$n(O_3) = \frac{[S_2O_3^{2-}]V(S_2O_3^{2-})}{2}$$

$$D_{mass} = \frac{n(O_3) * 48 \text{ g/mol}}{\Delta t}$$

#### 1. Ozone determination by titration of the KI solution

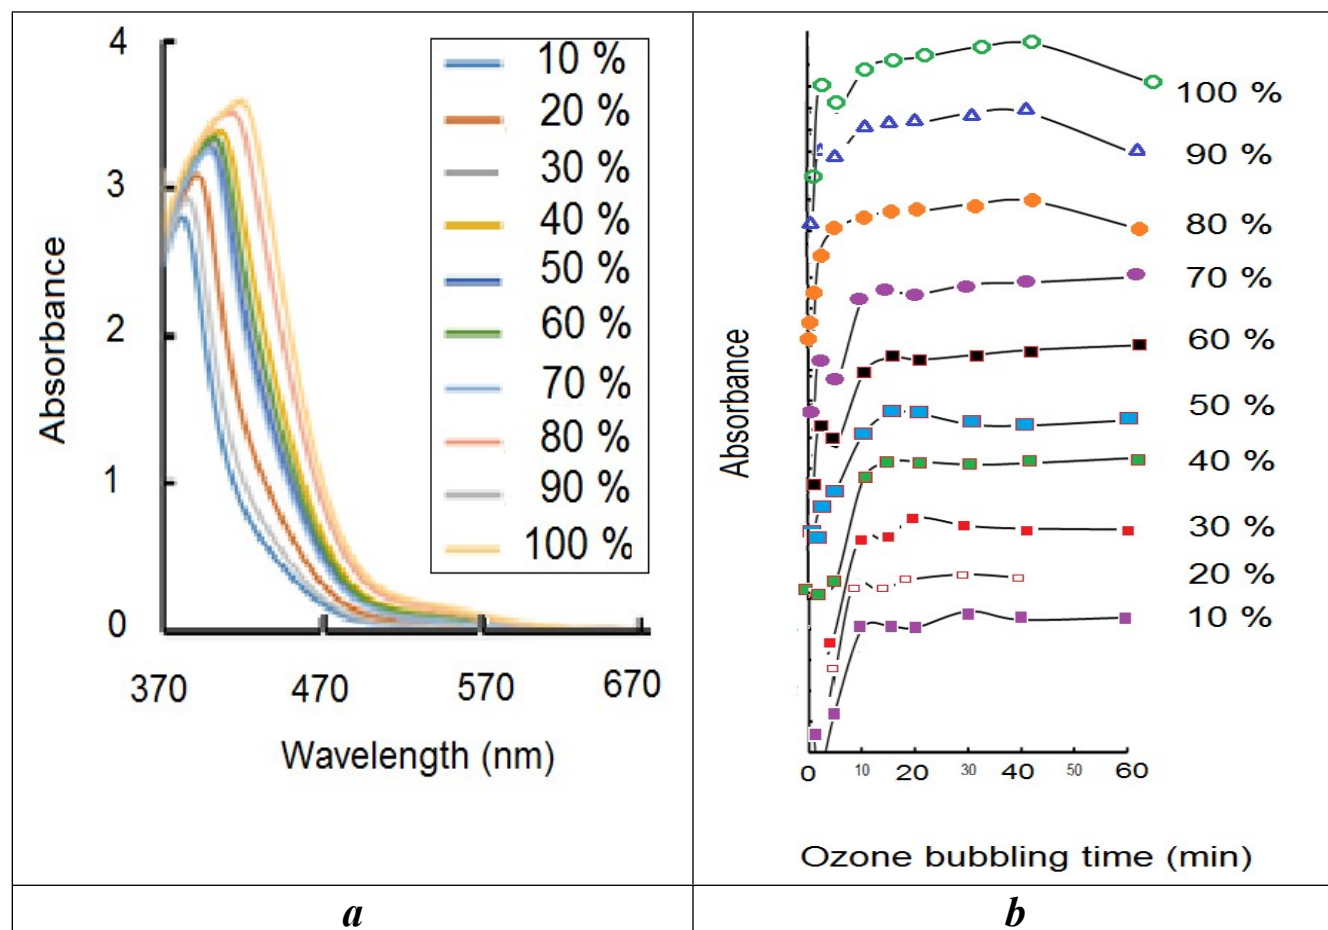

**Fig. S5.** UV-Vis absorbance spectra of ozone in KI solution (a) and absorbance evolution as a function of ozone proportion in the bubbling air (%) (b).

## DCF ozonation kinetics

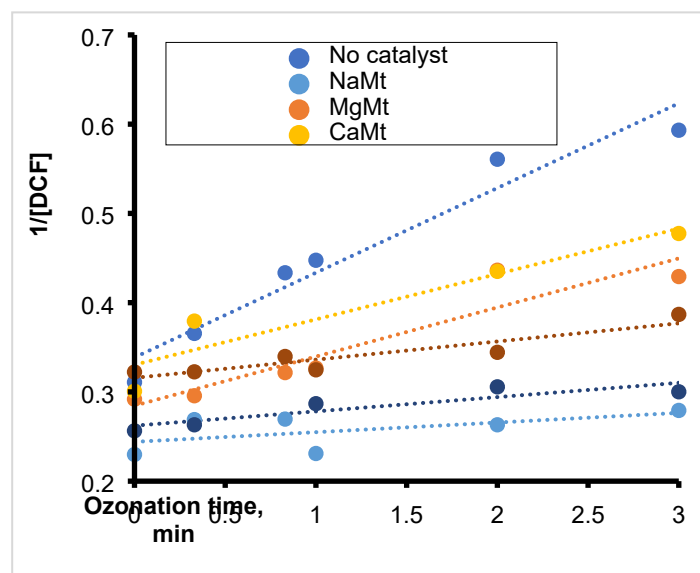

Fig. S6. 2<sup>nd</sup>-order kinetics of DCF catalytic ozonation.

## Possible reaction pathways of ozonation based on a synthetic analysis of the literature

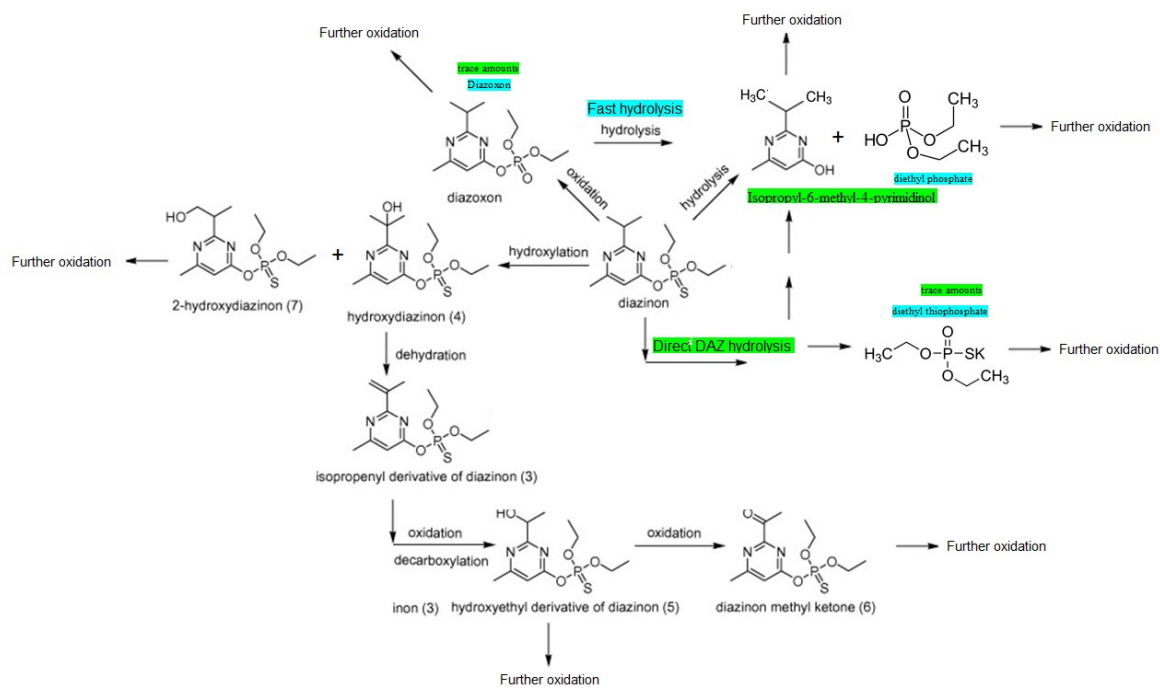

Scheme S1. Synthetic illustration of simultaneous degradation pathways in diazinon ozonation.

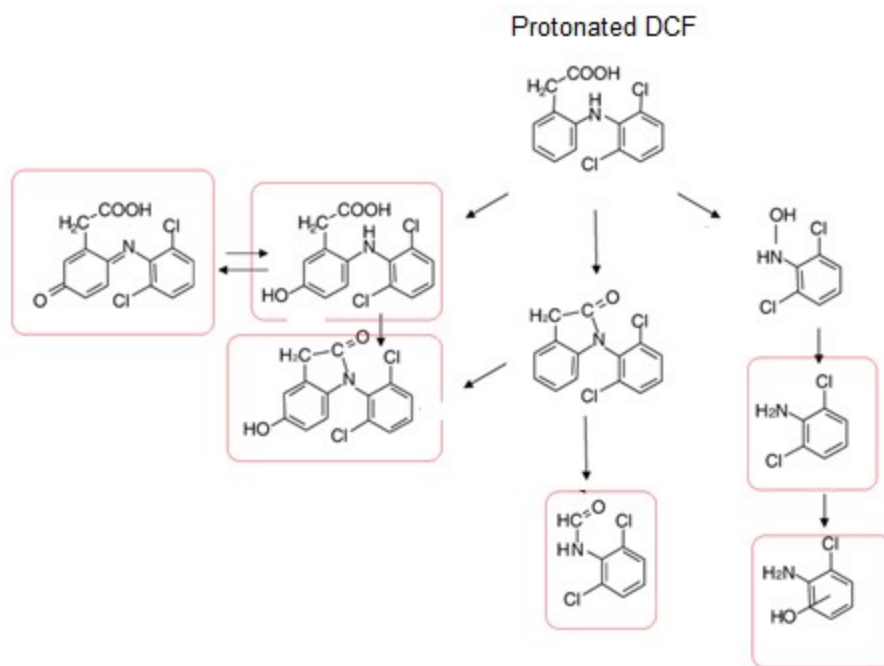

**Scheme S2.** Synthetic illustration of simultaneous degradation pathways in Diclofenac-Na ozonation. The most predominant DCF intermediates are presented in red frames.
